# Supplementary material for: Mapping transcription factor occupancy using minimal numbers of cells in vitro and in vivo
Source: PubMed Central journal article supplement (PMC5880248; doi:10.1101/gr.227124.117), 2018-04
Supplement: supp_gr.227124.117_Supplemental_Fig_S1.pdf [file supp_gr.227124.117_Supplemental_Fig_S1.pdf]

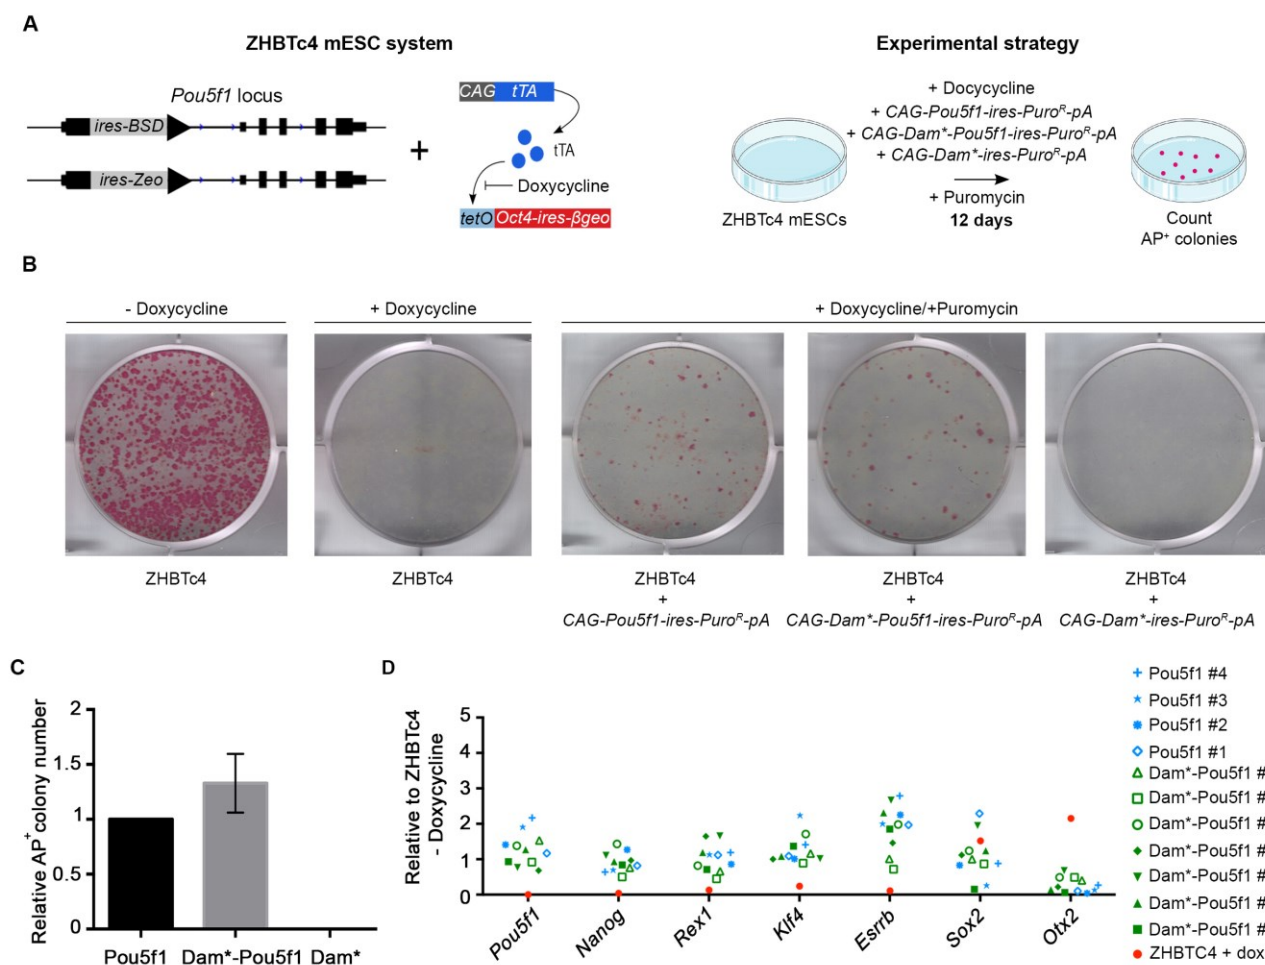

**Supplemental Figure S1: DAM-POU5F1 is functionally equivalent to POU5F1.** (A) In ZHBTc4 ESCs, two endogenous *Pou5f1* alleles were knocked out, and tetO promoter-driven POU5F1 sustains an undifferentiated state in the absence of doxycycline (Niwa et al. 2000) (left). The ability to maintain the undifferentiated state of POU5F1, DAM\*-POU5F1 and DAM\* expression vector was assessed upon administration of doxycycline (right). *Dam\** (Dam D181A mutant), which lacks methylation activity without altering its DNA binding capacity (Liebert et al. 2004), was used in these experiments as over-expression of wild-type DAM is toxic. (B) Alkaline phosphatase (AP) staining identified undifferentiated ZHBTc4 ESC colonies maintained by wild type POU5F1 and DAM\*-POU5F1. (C) Quantification of AP<sup>+</sup> colonies in ZHBTc4 ESCs transfected with POU5F1 wild type, DAM\*-POU5F1 or DAM\*-only. Data represent mean  $\pm$  s.e.m. (n=2). (D) Gene expression of ZHBTc4 ESC clones (passage 5) maintained with POU5F1 wild type (blue), DAM\*-POU5F1 (green), and differentiated cells without a rescue plasmid (red).
