# Supplementary material for: Mapping transcription factor occupancy using minimal numbers of cells in vitro and in vivo
Source: PubMed Central journal article supplement (PMC5880248; doi:10.1101/gr.227124.117), 2018-04
Supplement: supp_gr.227124.117_Supplemental_Fig_S2.pdf [file supp_gr.227124.117_Supplemental_Fig_S2.pdf]

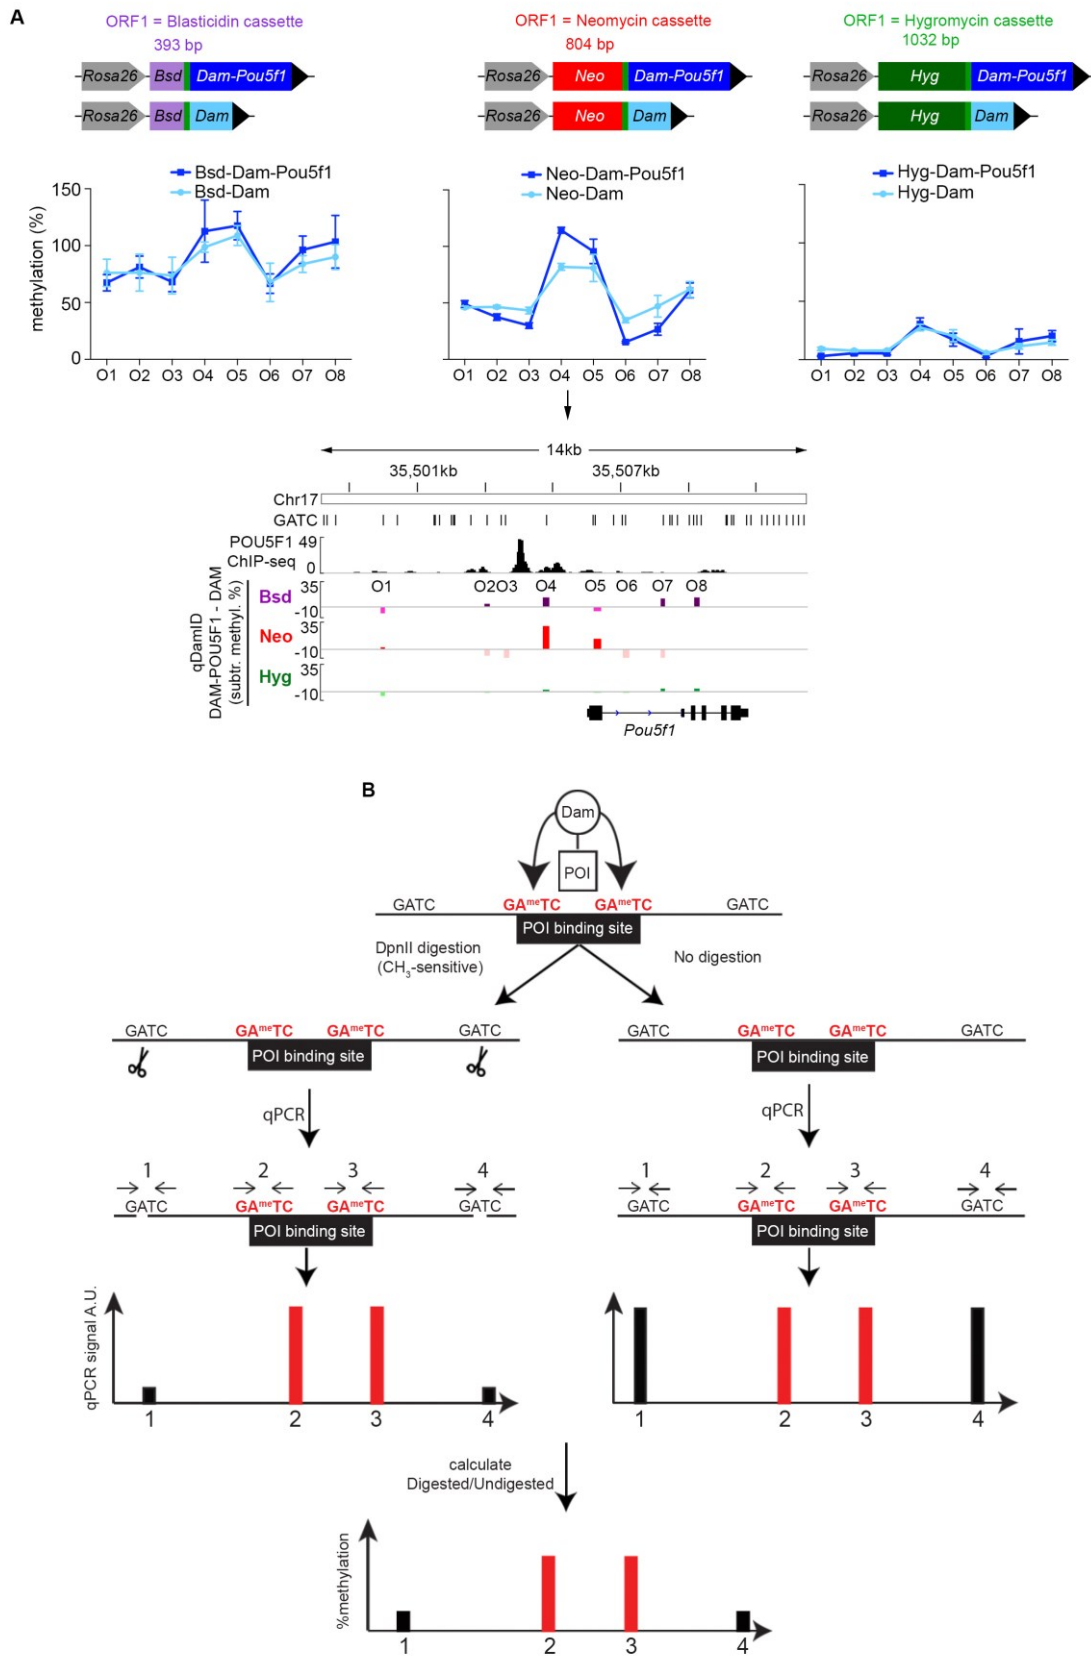

**Supplemental Figure S2: Identification of the optimal 1<sup>st</sup> ORF for translation reinitiation-mediated DamID.** (A) Methylation levels in the *Pou5f1* locus measured by qDamID (see B) in cell lines with different 1<sup>st</sup> ORFs before the *Dam/Dam-Pou5f1* coding sequences. Data represent mean  $\pm$  s.e.m. (n=4). O1-O8 represents the position of the GATC sites analysed by qDamID. The methylation levels (%) in DAM-POU5F1, DAM expressing cell lines were used to calculate the subtraction (DAM-POU5F1)-(DAM). *Bsd* = blasticidin resistance gene; *Neo* = neomycin resistance gene; *Hyg* = hygromycin resistance gene. (B) Schematic representation of the qDamID workflow. POI = protein of interest; GA<sup>me</sup>TC = adenine-methylated GATC sequence; A.U. = arbitrary unit.
