# Supplementary material for: Mapping transcription factor occupancy using minimal numbers of cells in vitro and in vivo
Source: PubMed Central journal article supplement (PMC5880248; doi:10.1101/gr.227124.117), 2018-04
Supplement: supp_gr.227124.117_Supplemental_Fig_S3.pdf [file supp_gr.227124.117_Supplemental_Fig_S3.pdf]

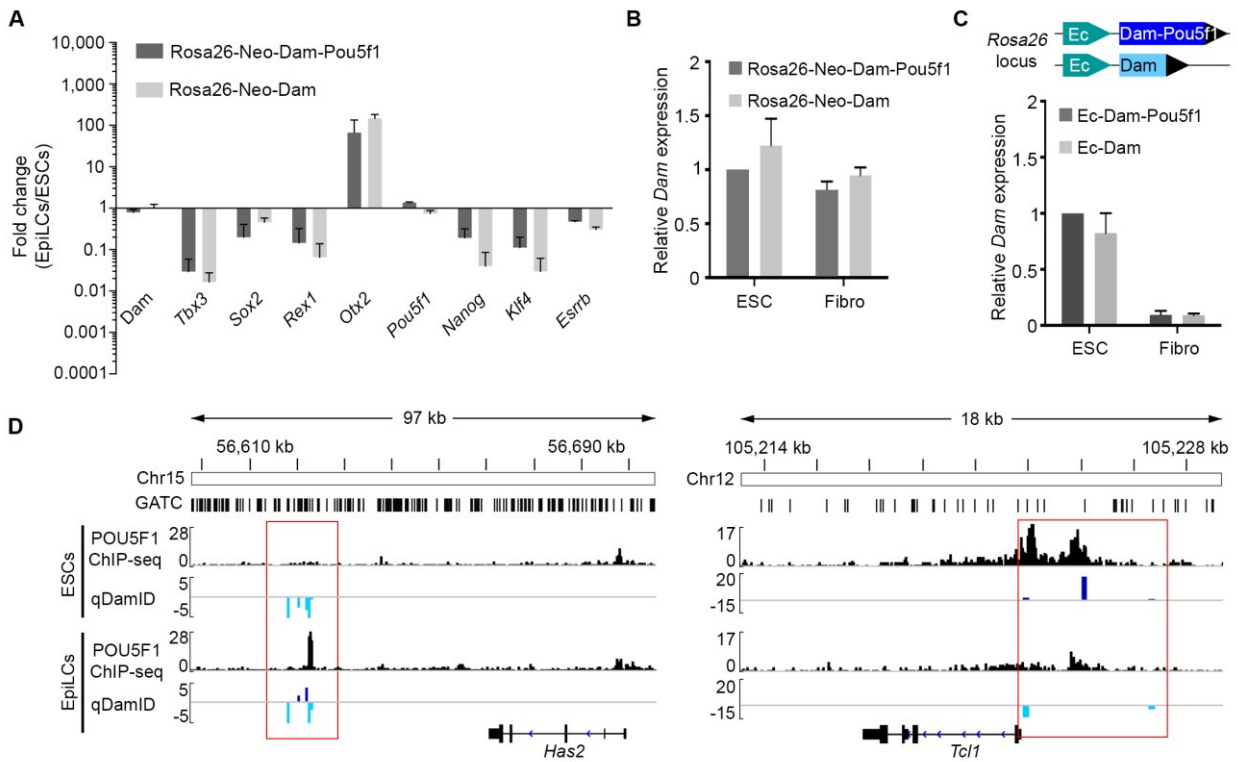

**Supplemental Figure S3: Gain and loss of qDamID signal upon ESCs differentiation.** (A) Similar expression changes of pluripotency-related genes after conversion of Rosa26-Neo-Dam-Pou5f1 and Rosa26-Neo-Dam ESCs to EpiLCs. Data plotted as mean  $\pm$  s.e.m. (n=3). (B) Expression level of *Dam* in Rosa26-Neo-Dam-Pou5f1 and Rosa26-Neo-Dam ESCs and *in vitro* differentiated fibroblasts. Data represent mean  $\pm$  s.e.m. (n=2). (C) Expression level of *Dam* mRNA in Rosa26-Ec-Dam-Pou5f1 and Rosa26-Ec-Dam ESCs and *in vitro* differentiated fibroblasts. Data represent mean  $\pm$  s.e.m. (n=2). Ec = Ecdysone-inducible promoter. (D) qDamID analysis in the *Has2* and *Tcf1* loci with Rosa26-Neo-Dam-Pou5f1 and Rosa26-Neo-Dam ESCs and EpiLCs in comparison with POU5F1 ChIP-seq data (Buecker et al. 2014). Y-axis; subtracted methylation level (%).
