# Supplementary material for: Mapping transcription factor occupancy using minimal numbers of cells in vitro and in vivo
Source: PubMed Central journal article supplement (PMC5880248; doi:10.1101/gr.227124.117), 2018-04
Supplement: supp_gr.227124.117_Supplemental_Fig_S5.pdf [file supp_gr.227124.117_Supplemental_Fig_S5.pdf]

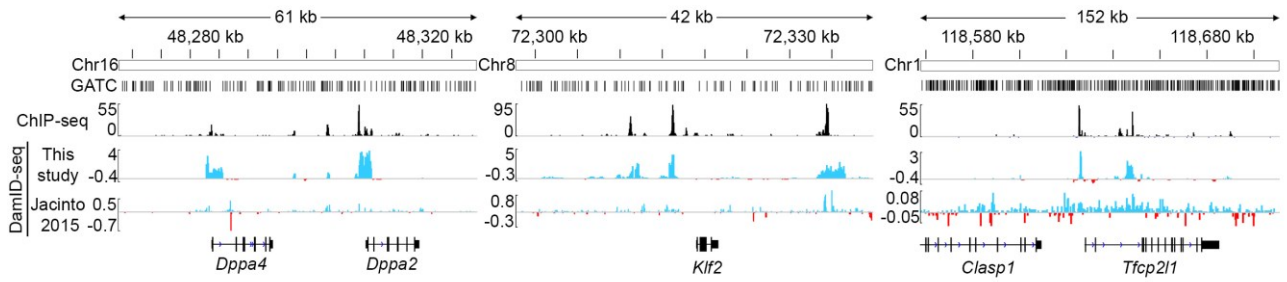

**Supplemental Figure S5: Comparison of POU5F1 DamID-seq signal in different studies.** POU5F1 binding signal detected by ChIP-seq (Buecker et al. 2014) (top), by DamID-seq in this study with  $10^6$  cells (middle) and in Jacinto et al. 2015 (bottom) at the 3 different loci. The protocol described in this study improves the signal-to-noise ratio of the DamID-seq signal providing higher agreement with ChIP-seq.
