# Supplementary material for: Mapping transcription factor occupancy using minimal numbers of cells in vitro and in vivo
Source: PubMed Central journal article supplement (PMC5880248; doi:10.1101/gr.227124.117), 2018-04
Supplement: supp_gr.227124.117_Supplemental_Fig_S6.pdf [file supp_gr.227124.117_Supplemental_Fig_S6.pdf]

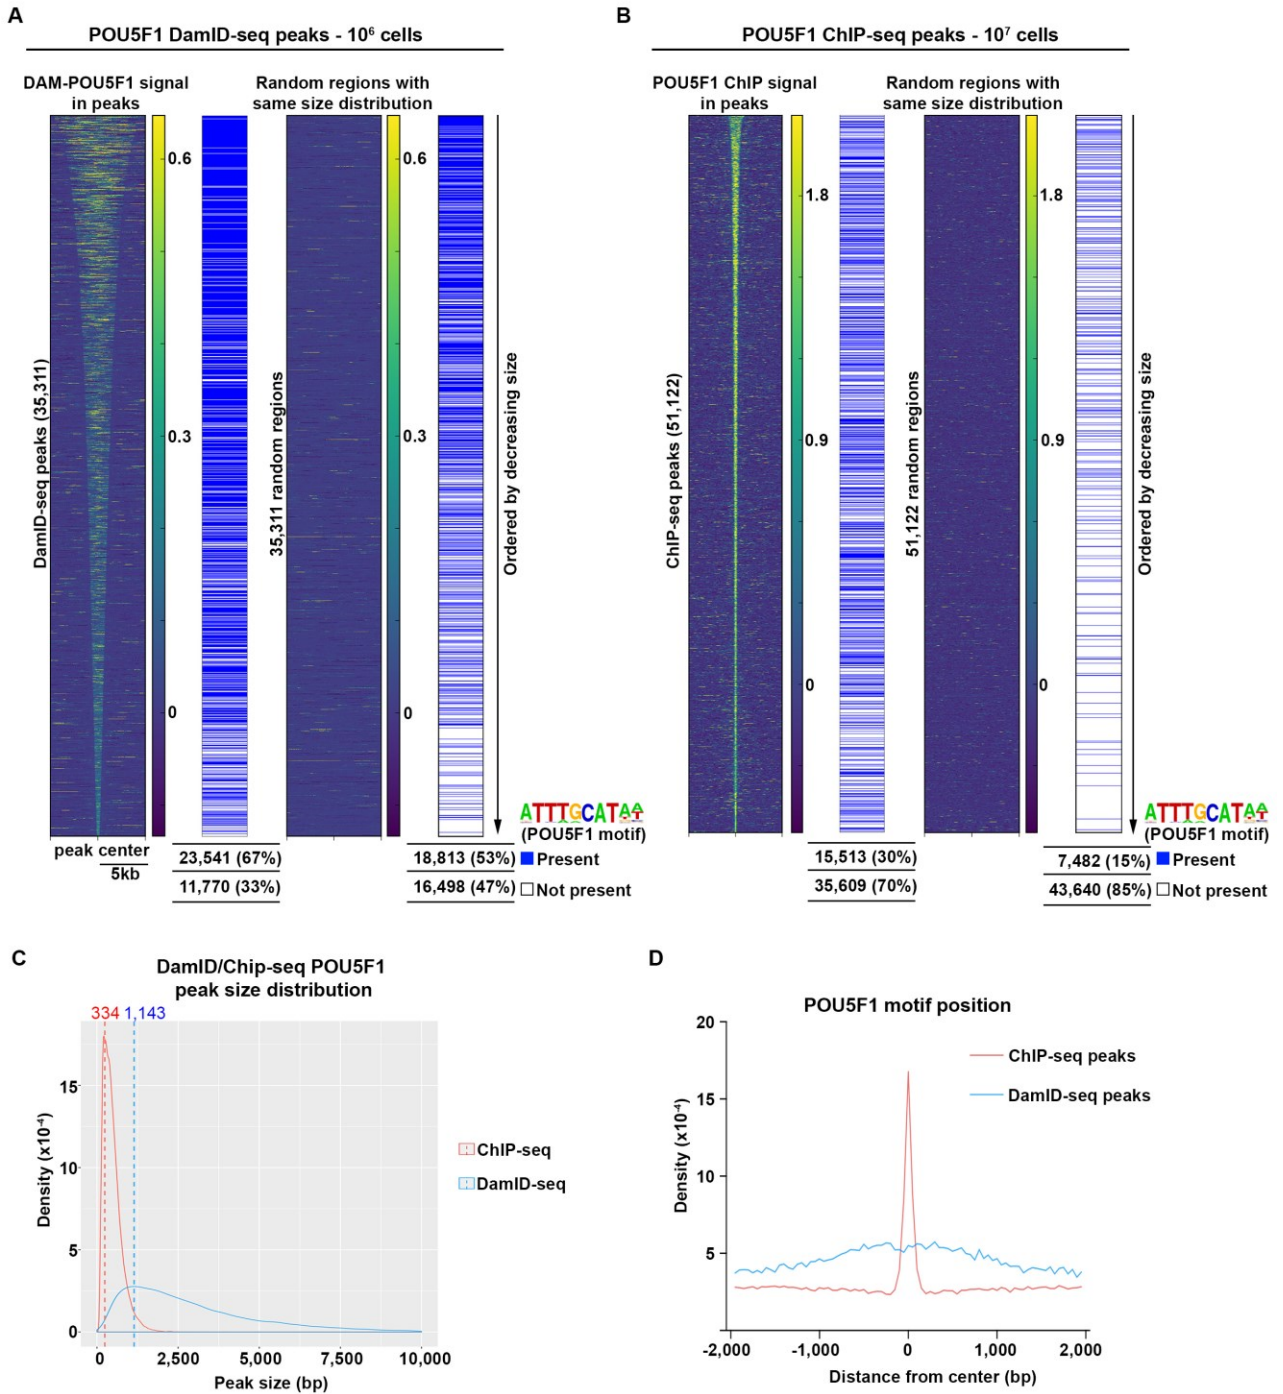

**Supplemental Figure S6: POU5F1 DamID-seq and ChIP-seq peak features.** (A,B) Each row of the left-hand side heatmaps represents POU5F1 DamID-seq (A) and ChIP-seq peaks (B) ranked by the size. Heatmaps on the right-hand side represent signal intensity of randomly selected genomic regions with the same sizes. For each peak/randomly selected region, the presence/absence of POU5F1 motif is indicated by blue/white lines. (C) Density plot of the POU5F1 DamID-seq and ChIP-seq peak size. The dashed lines represent the summit value for each group of peaks. (D) Distribution of the POU5F1 motif within +/-2 Kb from DamID-seq and ChIP-seq peak center.
