# Supplementary material for: Mapping transcription factor occupancy using minimal numbers of cells in vitro and in vivo
Source: PubMed Central journal article supplement (PMC5880248; doi:10.1101/gr.227124.117), 2018-04
Supplement: supp_gr.227124.117_Supplemental_Fig_S8.pdf [file supp_gr.227124.117_Supplemental_Fig_S8.pdf]

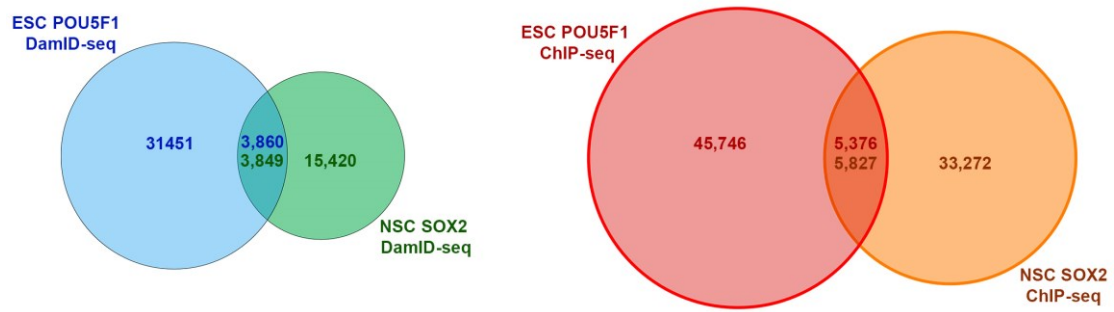

**Supplemental Figure S8: Overlaps between  $10^6$  ESC POU5F1 and  $10^6$  NSC SOX2 DamID-seq, ESC POU5F1 and NSC SOX2 ChIP-seq.** The overlap between POU5F1 binding sites in ESCs and SOX2 binding sites in NSCs is small in either DamID-seq or ChIP-seq.
