# Supplementary material for: Mapping transcription factor occupancy using minimal numbers of cells in vitro and in vivo
Source: PubMed Central journal article supplement (PMC5880248; doi:10.1101/gr.227124.117), 2018-04
Supplement: supp_gr.227124.117_Supplemental_Fig_S9.pdf [file supp_gr.227124.117_Supplemental_Fig_S9.pdf]

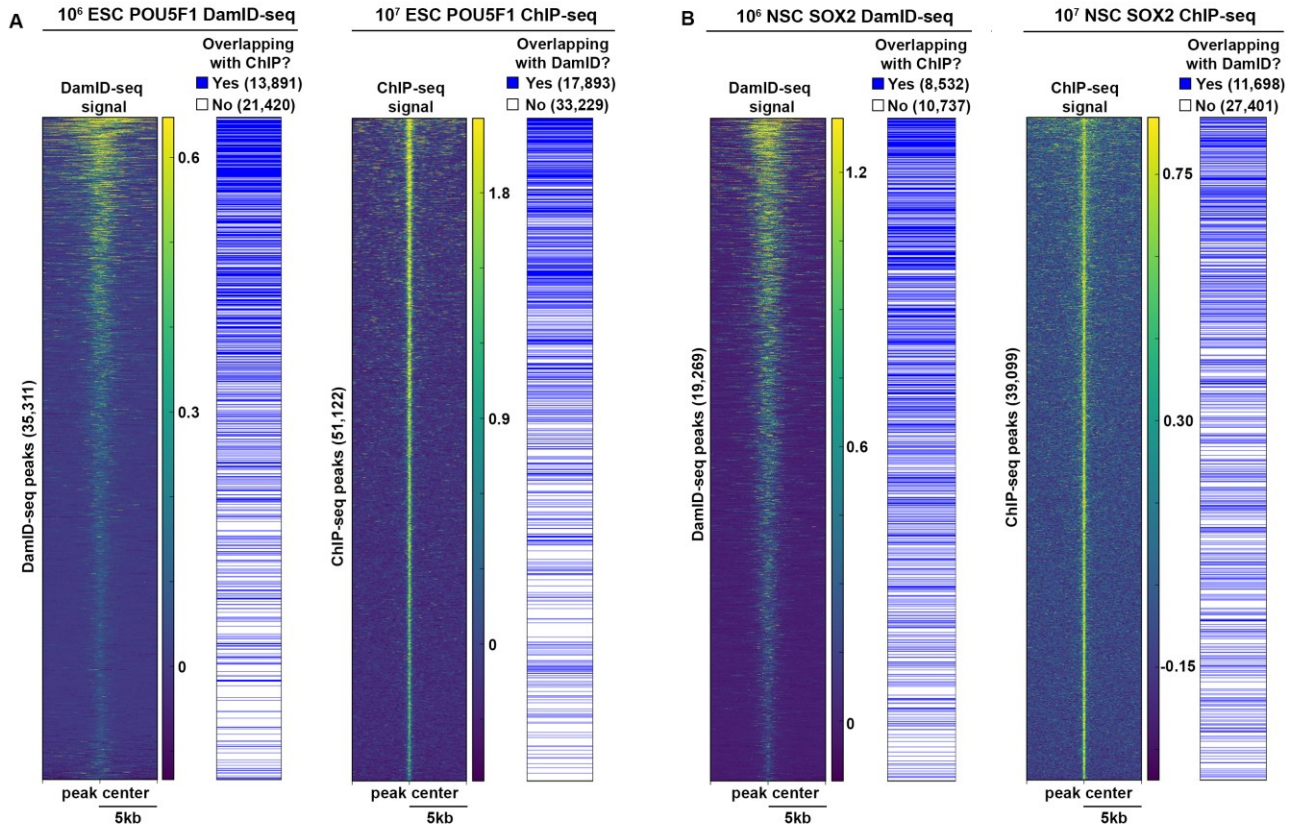

**Supplemental Figure S9: Strong peaks in 10<sup>6</sup> ESC DamID-seq and ChIP-seq overlap with each other.** (A, B) Heatmaps show 10<sup>6</sup> ESC POU5F1 DamID-seq (left) and ChIP-seq (right) peaks (A), 10<sup>6</sup> NSC SOX2 DamID-seq (left) and ChIP-seq (right) peaks (B) ranked by the signal intensity. Blue and white colour next to the heatmaps indicates if each peak has been identified by the other technique.
