# Supplementary material for: Mapping transcription factor occupancy using minimal numbers of cells in vitro and in vivo
Source: PubMed Central journal article supplement (PMC5880248; doi:10.1101/gr.227124.117), 2018-04
Supplement: supp_gr.227124.117_Supplemental_Fig_S10.pdf [file supp_gr.227124.117_Supplemental_Fig_S10.pdf]

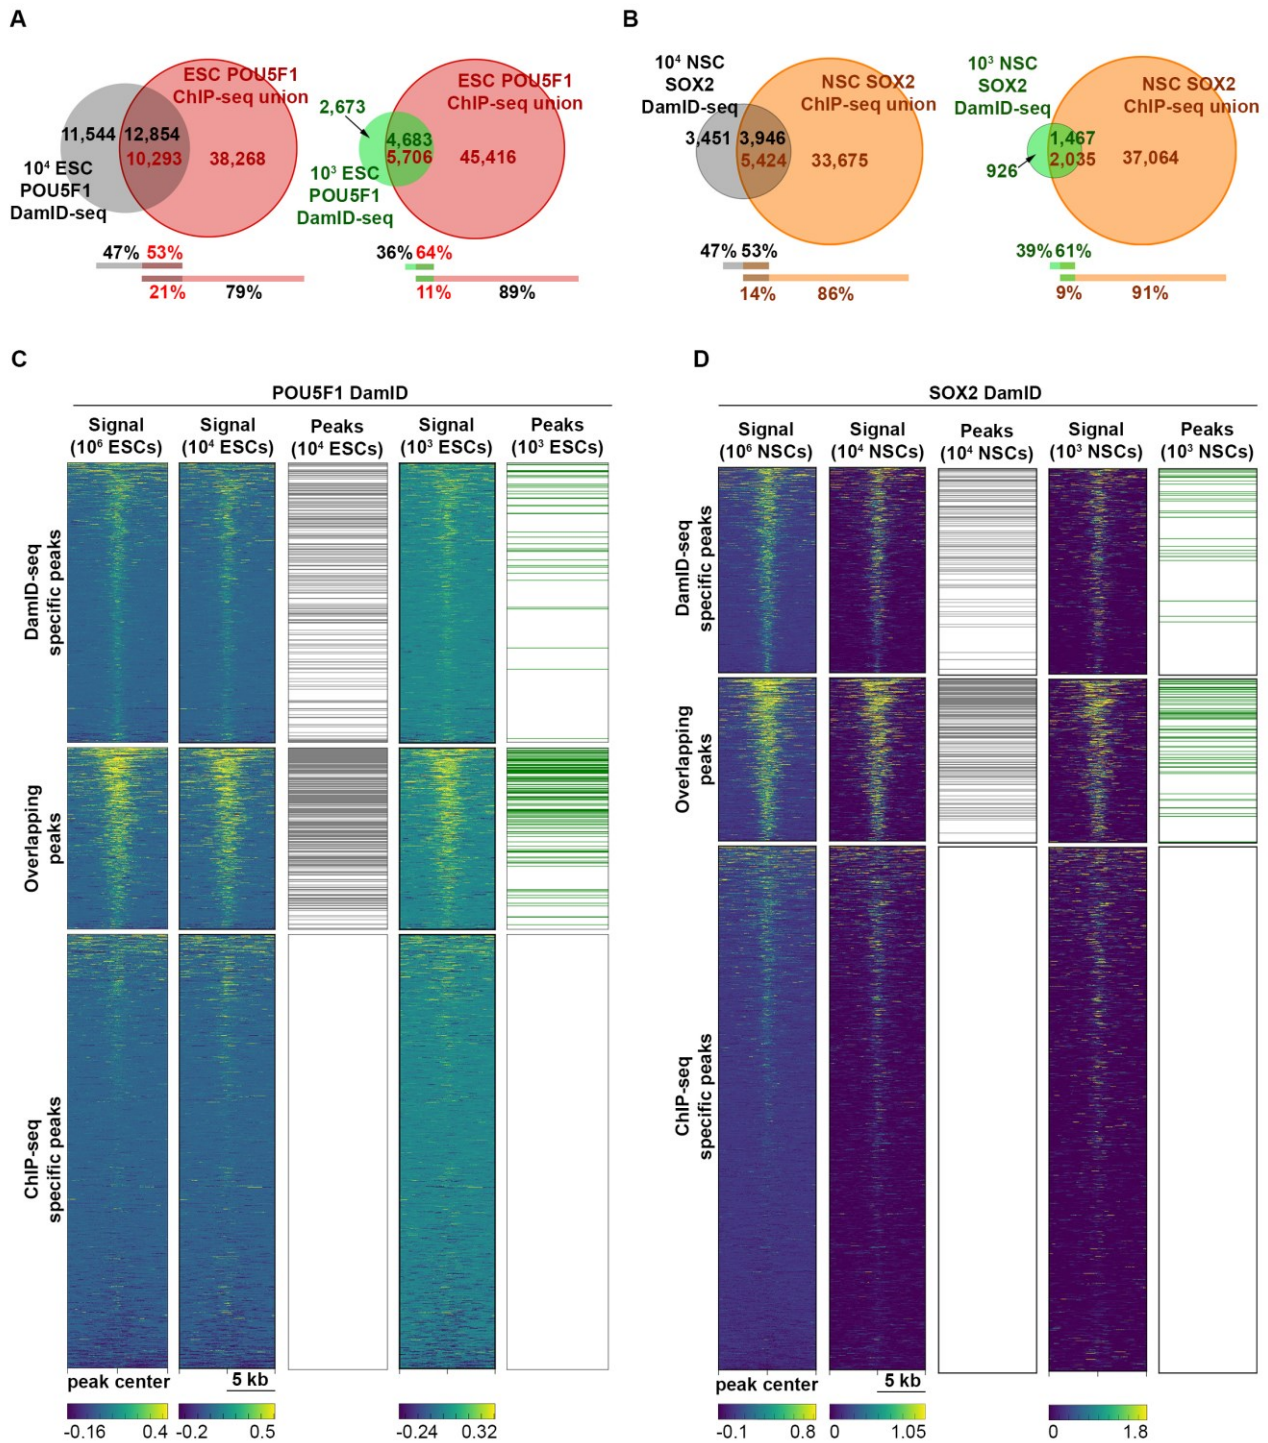

**Supplemental Figure S10: DamID-seq peaks from 10<sup>4</sup>, 10<sup>3</sup> cells overlap with ChIP-seq peaks (A, B) Overlaps between 10<sup>4</sup>, 10<sup>3</sup> ESC POU5F1 DamID-seq and ESC POU5F1 ChIP-seq (A), 10<sup>4</sup>, 10<sup>3</sup> NSC SOX2 DamID-seq and NSC SOX2 ChIP-seq (B). (C, D) Signal intensity in the genomic loci with DamID-seq/ChIP-seq specific and overlapping peaks in the comparison between 10<sup>6</sup> cell DamID-seq and ChIP-seq. POU5F1 DamID-seq signal in 10<sup>6</sup>/10<sup>4</sup>/10<sup>3</sup> ESCs (C) and SOX2 DamID-seq signal in 10<sup>6</sup>/10<sup>4</sup>/10<sup>3</sup> NSCs are shown. The grey and green lines indicate regions identified as a peak in 10<sup>4</sup> and 10<sup>3</sup> cells, respectively.**
