# Supplementary material for: Mapping transcription factor occupancy using minimal numbers of cells in vitro and in vivo
Source: PubMed Central journal article supplement (PMC5880248; doi:10.1101/gr.227124.117), 2018-04
Supplement: supp_gr.227124.117_Supplemental_Fig_S11.pdf [file supp_gr.227124.117_Supplemental_Fig_S11.pdf]

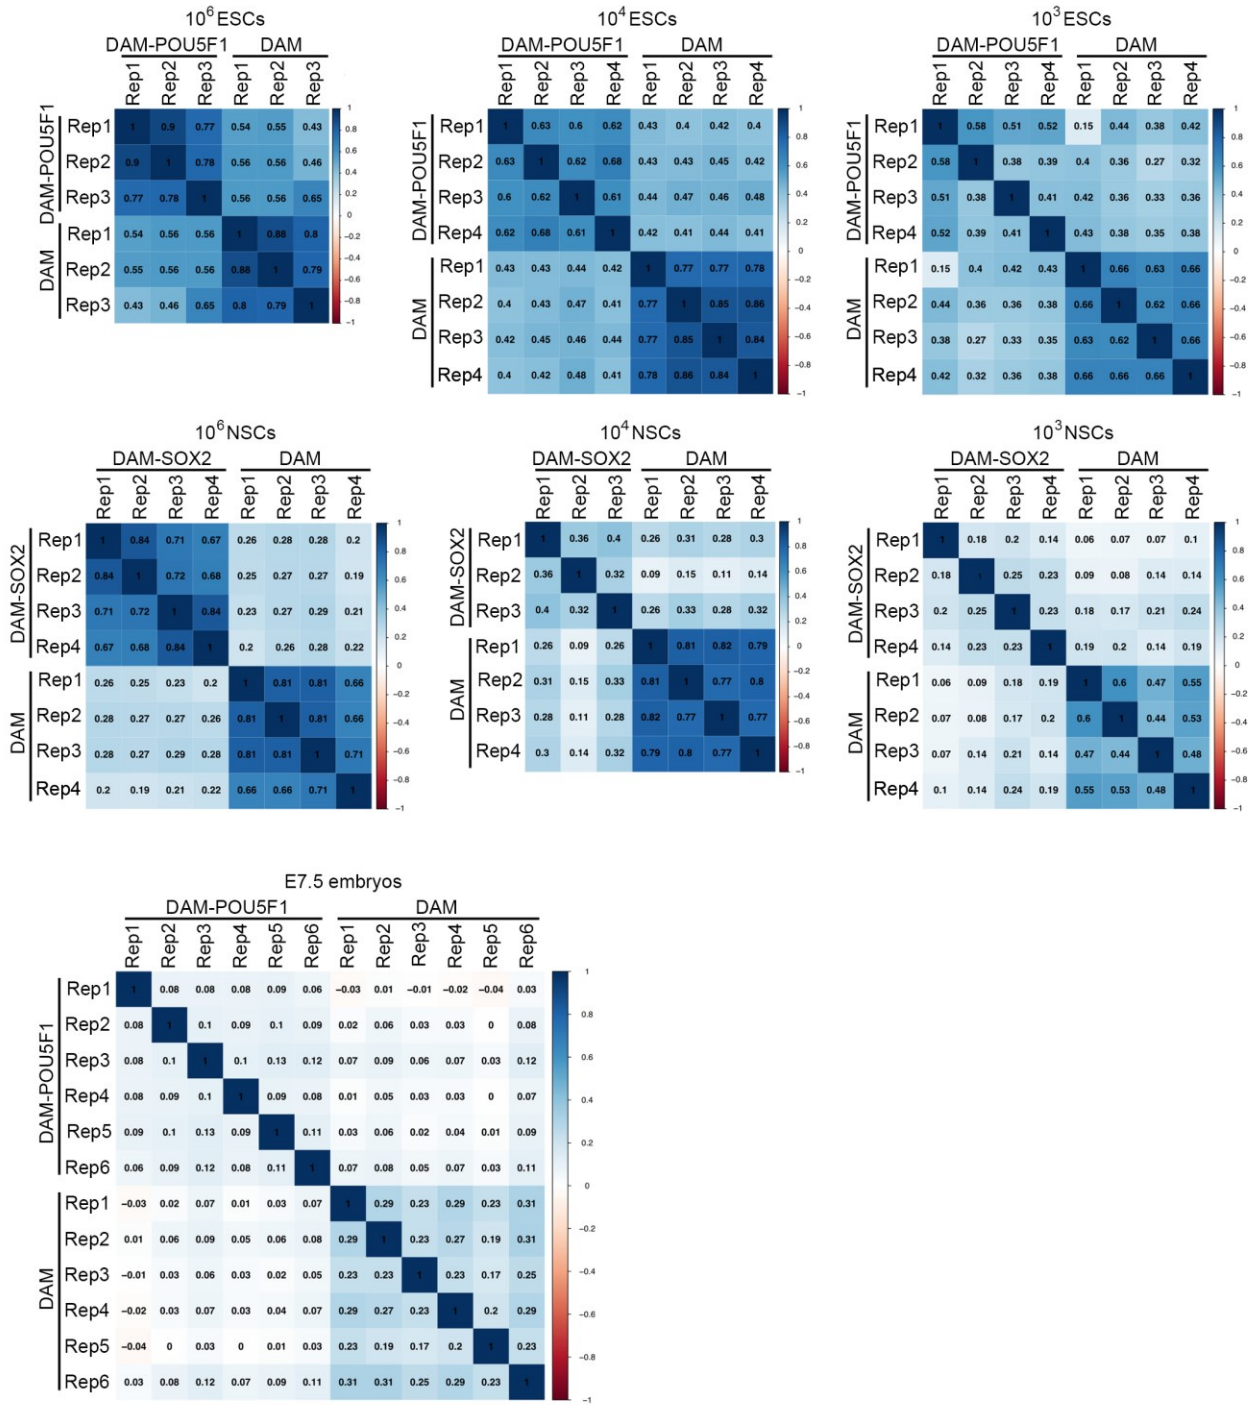

**Supplemental Figure S11: Correlation plots of DAM only, DAM-POU5F1 and DAM-SOX2 replicates in 10<sup>6</sup>, 10<sup>4</sup>, 10<sup>3</sup> ESCs, NSCs, and 7.5 dpc embryos.** The heatmaps show the correlation among DAM-only, and DAM-POU5F1 or DAM-SOX2 replicates. Pearson correlation was calculated over each GATC fragment. In general, DAM-only samples show higher correlation than DAM-POI samples. The replicates from lower cell numbers showed lower correlation, and those from 7.5 dpc embryos had the lowest correlation, i.e. the largest variation.
