# Supplementary material for: Mapping transcription factor occupancy using minimal numbers of cells in vitro and in vivo
Source: PubMed Central journal article supplement (PMC5880248; doi:10.1101/gr.227124.117), 2018-04
Supplement: supp_gr.227124.117_Supplemental_Fig_S12.pdf [file supp_gr.227124.117_Supplemental_Fig_S12.pdf]

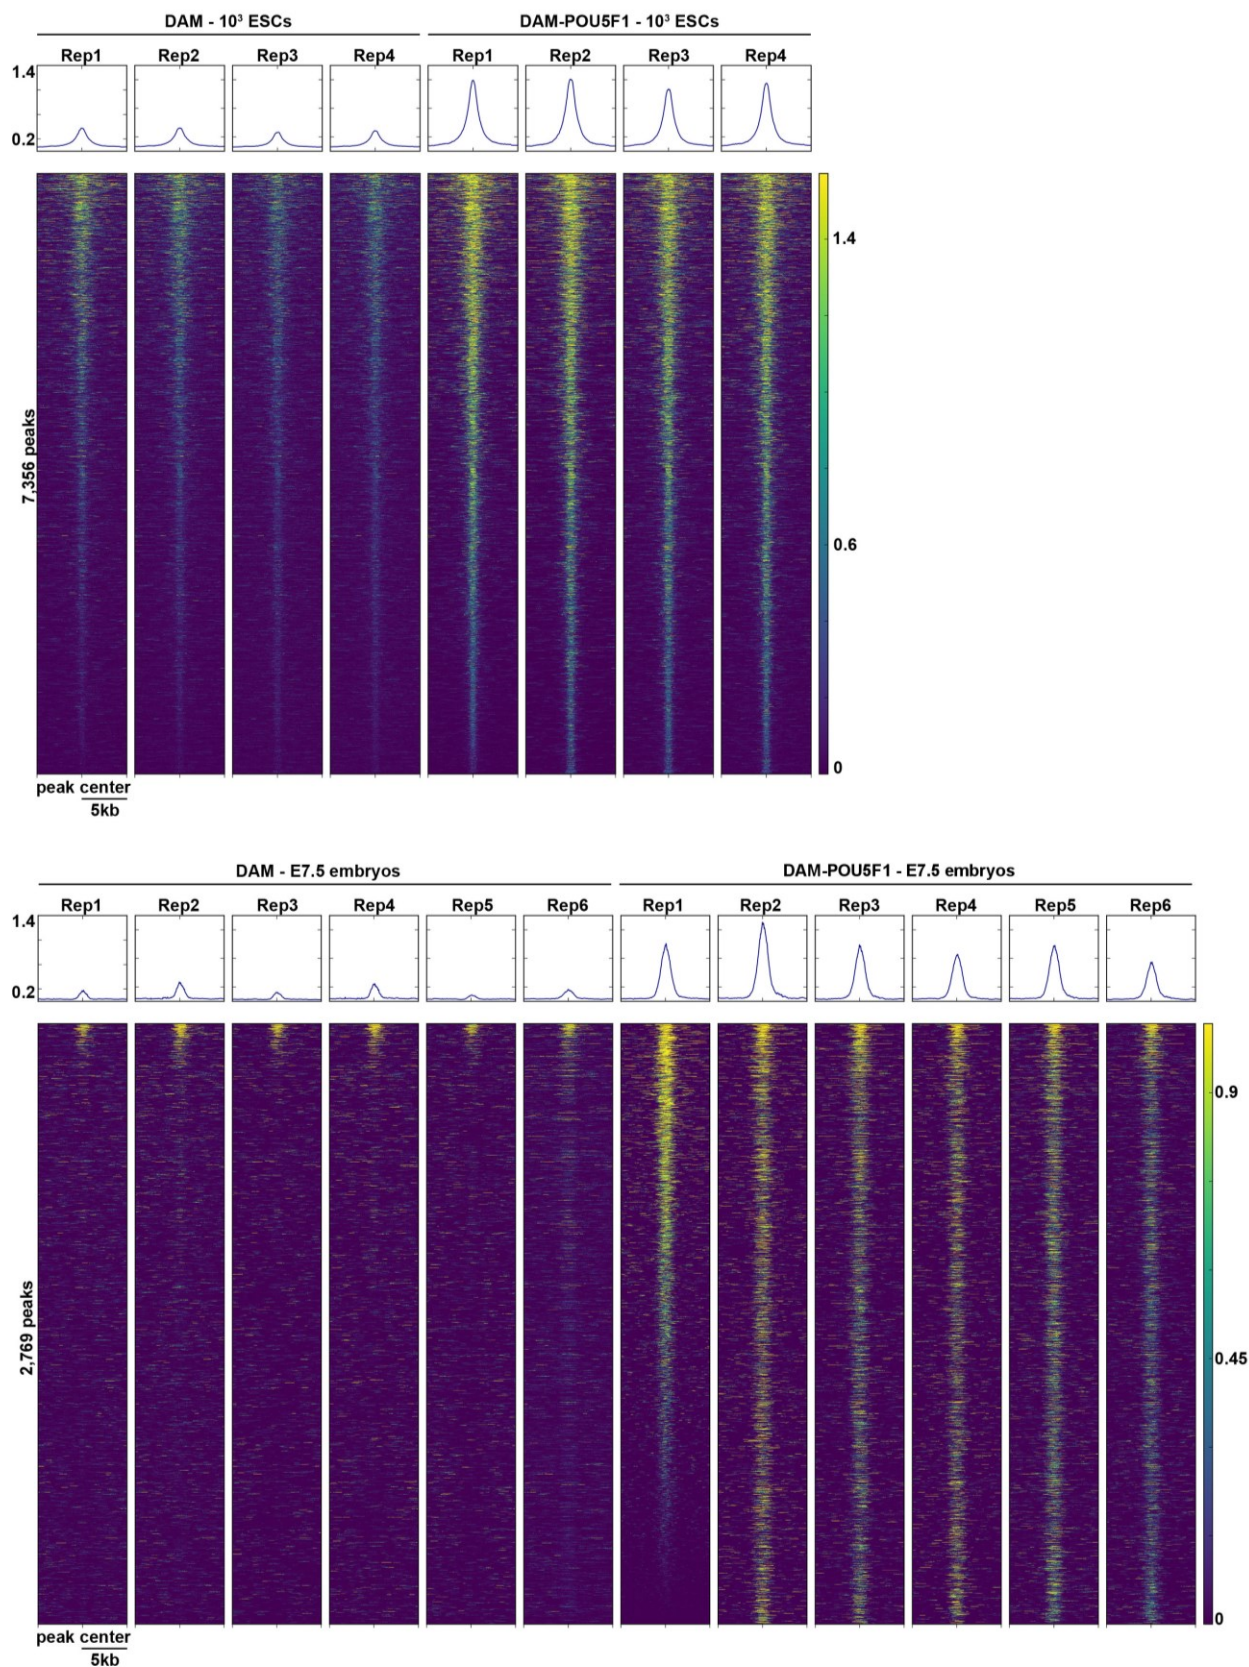

**Supplemental Figure S12: DamID-seq signal reproducibility in peak regions.** (A) DAM-only and DAM-OCT4 signal in the 7,356 peaks identified from 10<sup>3</sup> ESCs and (B) and in 2,769 peaks identified from different 7.5 d.p.c. embryos. Despite the overall variability across the genome (Supplemental Fig. S10), DamID-seq signal is highly consistent in the peak regions identified in our peak caller.
