# Supplementary material for: Mapping transcription factor occupancy using minimal numbers of cells in vitro and in vivo
Source: Genome Res. 2018 Apr;28(4):592–605. doi: 10.1101/gr.227124.117 (PMC5880248; doi:10.1101/gr.227124.117)
Supplement: Supplemental Material [file supp_gr.227124.117_Supplemental_Table_S2.xlsx]

## Sheet: supplementary_table_1.txt
	ES	iPSC	iPSC	iPSC	CAV	CAV	PS	PS	LMS	LMS	LMS	LS	LS	LS	OB	EB	EB	EB	LB	LB	LB
Adcyap1	6.68004	6.79059	6.74263	6.70505	6.81906	6.8174	6.79286	6.87061	6.9571	6.84678	6.8935	6.60765	6.99115	6.85962	6.79867	7.07405	7.02734	7.06759	6.76337	7.02349	6.90169
Adrb2	7.23887	8.05383	7.97613	7.24107	7.07424	7.49516	6.7216	6.98183	6.7897	6.83737	6.66017	6.88676	6.8146	6.86878	6.95607	6.6784	7.00332	6.80987	6.75061	6.79282	6.80053
Angpt1	6.68825	6.78448	6.71707	6.70118	6.70904	6.728	6.70922	6.60568	6.70816	6.62448	6.67202	6.77042	6.76839	6.72914	6.79731	6.71884	6.8285	6.71729	6.80173	6.73837	6.7291
Atf7ip	10.4099	9.63153	9.44556	10.4261	10.4289	9.87983	10.0665	10.2993	10.0322	10.2308	10.3215	10.0337	10.1475	9.71211	10.0609	10.3974	9.9714	10.1647	9.90641	10.1558	9.90689
Bcl11b	6.86807	6.97165	6.97838	6.95107	7.86038	8.0275	8.11549	7.98233	7.76233	7.80918	7.74248	7.95321	7.97014	7.95206	7.89702	7.63352	7.7525	7.6198	7.60169	7.5857	7.63907
Bmper	7.44656	7.5938	7.52832	7.35777	7.09481	6.84214	7.00786	6.79445	7.80424	7.30537	7.66768	7.4309	7.47127	7.84445	7.23511	7.83823	8.02094	8.10998	7.56466	7.36455	7.68443
Boc	6.7866	6.65529	6.72847	6.74381	6.85302	6.78455	6.7637	6.68786	6.77494	6.78298	6.66634	6.79816	6.87531	6.69188	6.68836	6.72624	6.65509	6.91374	6.78006	6.78181	6.68601
Ccnt2	6.82182	6.83698	6.87803	6.79255	6.94644	7.04693	6.82079	6.79817	6.97472	6.93358	6.97399	6.99382	6.94229	6.93568	6.81782	6.88123	6.94509	6.98172	6.92979	7.29603	6.8304
Chd9	8.47351	8.2299	8.17604	8.53818	8.02578	7.84808	7.83105	7.67686	7.47842	7.30028	7.40515	7.22982	7.75667	7.20349	7.75877	6.99823	7.07654	7.02749	7.03303	6.93435	7.33456
Cnot2	9.07266	8.86307	8.87536	9.05712	9.09658	9.05049	9.09349	9.09852	9.06504	9.0984	9.1525	8.94411	8.88036	8.966	8.88754	8.99561	8.8087	8.94484	9.12478	9.01096	9.02108
Csdc2	6.83829	6.80932	6.81363	6.83344	6.93877	6.83911	6.6766	6.79207	6.65257	6.89546	6.89955	6.74385	6.79947	6.8317	6.87391	6.7676	6.77893	6.91009	6.92018	6.95511	6.80774
Csrnp3	7.19132	6.81173	6.81575	7.18903	6.73114	6.60313	6.73777	6.63752	6.64369	6.70834	6.77152	6.69829	6.64971	6.71486	6.6945	6.97959	6.7757	6.93846	6.71994	6.69199	6.69147
Cul3	11.6444	11.1586	11.2334	11.6338	11.261	11.1506	11.2957	11.5971	11.3996	11.7883	11.8249	11.3087	11.304	11.0138	11.0313	11.68	11.3067	11.3495	11.4571	11.5036	11.4232
Dab2	8.02113	10.0381	9.6937	8.18967	8.61945	8.32628	8.40504	9.17361	8.4918	8.83605	8.28875	8.43101	8.50555	8.93683	8.75424	9.24391	9.05666	9.2534	9.36519	9.45509	9.96791
Dact1	6.7951	6.84811	6.90058	6.85706	6.68171	6.72031	6.78552	6.85718	6.66284	6.81844	7.09891	6.86248	6.75818	6.83497	6.68304	6.74652	6.79462	6.90228	6.8213	6.93364	6.8151
Dad1	11.7455	11.9973	12.2164	11.8078	11.6528	11.8844	11.963	11.6397	11.9921	11.8413	12.2895	12.578	12.4519	12.0635	11.6968	10.2543	10.9255	10.2836	10.8932	10.3453	10.5024
Dbx1	6.73024	6.7882	6.70353	6.67271	6.76739	6.74167	6.682	6.67766	6.84419	6.73904	6.72143	6.72249	6.743	6.73721	6.73239	6.76442	6.82208	6.66876	6.80593	6.73851	7.0108
Ddr1	7.97952	7.284	7.27935	7.99084	7.43101	7.32784	7.4309	7.17085	7.46345	7.37785	7.31828	7.35554	7.34702	7.52334	8.01826	7.32098	7.19617	7.186	7.62436	7.12427	7.09625
Dlx5	6.67085	6.66551	6.64994	6.6684	6.7232	6.7142	6.67155	6.7483	6.79511	6.68151	6.63804	6.65696	6.70394	6.65654	6.72021	6.7323	6.74048	6.78599	6.76185	6.6664	6.74848
Dmrt1	6.85995	6.77975	6.84395	6.84374	6.90984	6.80982	6.88098	6.78148	6.86089	6.8697	6.85244	7.12782	6.976	6.807	7.04982	7.36852	6.87446	7.21708	6.99805	7.14599	6.97851
E2f7	6.8902	6.83283	6.85535	6.91086	6.98954	7.04829	7.18696	7.11885	7.01152	7.0723	7.1707	7.11392	6.92186	7.19451	6.79996	6.78241	6.88323	6.81575	7.19941	6.81437	6.77464
En1	7.31145	7.80567	7.61255	7.2313	6.78877	6.8165	6.83929	6.78435	6.825	6.81605	6.79483	6.75224	6.75317	6.80701	6.93733	6.74533	6.73936	6.83408	6.88904	6.83188	7.01918
Eomes	6.87885	7.38657	7.38482	6.91194	9.36975	9.04288	9.37209	9.6087	8.62102	9.61612	10.9456	9.60521	9.03993	8.54953	7.80525	8.9704	10.0721	9.0937	8.5051	8.82736	8.65847
Epx	6.82926	6.73676	6.68979	6.78538	6.83154	6.85426	6.84791	6.71068	6.77838	6.75043	6.83365	6.72274	6.72364	6.68725	6.80253	7.01708	6.73472	6.91012	6.79699	6.82631	6.80392
Etl4	8.92203	8.8943	8.90034	8.90203	9.28157	9.21807	8.95339	9.05593	9.01207	8.82071	8.72805	9.20438	9.33195	9.10078	9.1608	8.89153	8.99397	9.11189	8.76275	8.8548	9.1074
Evx1	7.07327	7.45046	7.39653	7.09	9.15678	8.02285	8.45834	8.32014	9.173	9.68589	10.4143	10.5223	9.06978	10.2857	8.50454	9.48983	9.71896	9.06169	9.04497	9.25599	8.87593
Fezf1	6.71483	6.77993	6.82085	6.698	6.67797	6.7347	6.79439	6.77803	6.87602	7.04364	6.84312	6.73056	6.69966	7.42018	7.8882	7.88565	7.08149	7.39598	7.48367	7.69793	7.39378
Flt1	7.08394	7.16602	7.15799	7.12161	7.54965	7.4056	7.51074	7.43635	7.56469	7.81317	8.19621	8.35748	8.69478	8.08285	8.56657	8.0406	8.14888	8.20006	8.37137	8.1466	8.13755
Foxb1	6.82493	6.8929	6.83072	6.8563	6.84338	6.67673	6.77935	6.86249	7.5627	8.1645	7.58087	7.9376	7.71525	8.13632	8.35282	9.24518	8.9209	9.08441	9.1026	9.01844	9.06413
Foxc1	6.8319	6.92638	6.87776	6.8127	6.60897	6.70034	6.73414	6.67339	6.79572	6.78461	7.55141	6.92677	6.86549	6.78603	6.93782	7.11197	7.13337	6.81633	6.99484	6.90787	6.73862
Foxd3	6.77792	6.77466	6.76044	6.7705	6.67548	6.84339	6.69659	6.68251	6.82301	6.75661	6.73887	6.6804	6.61599	6.661	6.84913	6.70233	6.58466	6.57681	6.8038	6.69811	6.68607
Foxf1	6.74363	6.81603	6.7265	6.74637	6.99036	6.77345	6.72174	6.8108	6.7658	6.7098	6.64286	6.74191	6.81491	6.74842	6.77135	6.69428	7.07811	6.7057	6.77543	7.06978	6.97547
Foxp1	8.61184	7.87547	7.81115	8.69579	8.40066	7.99931	8.17131	7.94343	7.54253	7.65873	7.53736	7.75158	7.97851	7.5927	8.38811	6.7491	7.26279	6.92661	7.76436	6.94409	6.82404
Frzb	6.82563	6.90854	6.89673	6.76774	7.16341	6.87059	7.13814	7.39898	8.5604	8.93047	9.74856	8.74154	7.99474	9.26794	7.97899	9.4467	9.60568	9.9666	9.97287	9.85284	9.66653
G2e3	7.63363	7.19214	7.16116	7.64016	7.71103	8.20421	8.27621	8.32512	8.15173	8.28519	8.18603	6.9444	6.92011	7.0013	6.88386	7.9541	7.7609	7.8193	7.60045	7.78139	7.94292
Glis3	6.70897	6.71214	6.70799	6.73139	6.74959	6.71519	6.74839	6.80075	6.71418	6.72987	6.74125	6.73865	6.69454	6.70693	6.72781	6.72214	6.71921	6.72585	6.65443	6.72393	6.66333
Gsx1	6.74217	6.90482	6.89892	6.70457	6.86024	6.70726	6.74116	6.576	6.70773	6.67552	6.68768	6.71704	6.71398	6.7942	6.87688	7.39475	7.09516	7.79273	7.1047	7.19007	7.5618
Hand2	6.72861	6.68146	6.75338	6.75261	6.84595	6.68719	6.72221	6.8273	6.58195	6.6757	6.77007	6.64649	6.82567	6.68839	6.71829	6.56024	6.73703	6.62343	6.69664	6.54815	6.82166
Hmg20a	7.78274	7.98582	7.96116	7.85191	7.85049	7.80981	7.98998	7.89195	7.97527	7.82194	8.06431	7.77345	7.63695	7.78006	7.79234	7.72317	7.67251	7.49091	7.66664	7.57892	7.73606
Hoxb8	6.7601	6.81495	6.79135	6.79103	6.69364	6.68096	6.61461	6.77533	6.64695	6.85372	6.65044	6.67646	6.64018	6.76192	7.02249	6.68098	6.74292	6.6609	6.63068	6.76673	6.81205
Irf8	6.79414	6.79548	6.83166	6.88165	6.98985	6.98553	7.07487	6.86924	6.96065	7.03515	6.98065	6.79945	6.8498	6.83222	6.95127	7.31236	6.96129	7.22993	7.29486	7.18361	6.91289
Irx3	8.0501	8.25883	8.12751	7.98426	6.99746	7.38525	7.53478	6.88329	11.8249	10.9516	10.3839	8.84928	8.7527	9.44366	10.347	11.985	11.5839	11.9782	12.7275	11.9007	11.936
Irx5	7.28306	7.47982	7.35371	7.30225	6.82474	6.63686	6.92707	6.88102	9.76764	9.26066	9.62469	8.77014	8.31958	9.29201	10.0857	11.6385	11.3104	11.8884	11.6741	11.708	11.5477
Isx	6.6723	6.70235	6.65879	6.67559	6.72173	6.67471	6.72492	6.69067	6.68895	6.64734	6.70115	6.73032	6.6706	6.61135	6.57076	6.55824	6.5968	6.7994	6.75394	6.7071	6.68658
Jmjd1c	7.13652	7.14698	7.09157	7.13123	6.8948	6.8831	6.84339	6.9135	6.91899	7.01988	6.98012	6.79105	6.72486	6.79494	6.7933	6.85175	7.01014	6.97653	7.03379	7.04914	6.75986
Larp7	7.10172	6.96767	6.98689	7.07914	7.15355	6.93433	7.1136	6.90057	6.85305	6.93509	6.86484	6.85455	7.12235	6.95808	7.30581	7.19127	7.06187	7.22274	6.88226	7.34883	7.07452
Lhx1	6.7846	7.24007	7.25518	6.80053	6.73525	6.89055	6.76525	7.8246	6.8128	6.93195	9.88879	9.42395	6.74557	8.21541	6.83101	7.01176	7.67319	7.54417	6.91798	6.86338	6.72994
Med13l	7.2549	7.03411	7.02548	7.15061	6.76376	6.84196	6.90122	6.90028	6.86972	6.73326	6.93082	6.88383	6.81758	6.78445	6.65069	6.77816	6.81152	6.75663	6.7985	6.82378	6.83879
Mef2c	6.76097	6.75219	6.76308	6.73268	6.8519	6.82327	6.77432	6.91864	6.87655	6.92825	6.98219	6.85448	6.81609	6.82213	7.01284	7.08628	7.02053	7.14028	7.02159	6.9645	6.99697
Meis2	7.01059	8.53897	8.32616	7.06798	6.93859	6.81971	6.85019	6.96583	8.39594	8.37096	9.2068	7.88469	7.75023	8.59972	8.18322	10.3671	9.51704	10.3123	10.9223	11.0126	10.56
Mta3	9.95729	9.49975	9.65714	10.0056	9.34165	9.71565	9.41636	9.45668	9.44195	9.41046	9.30685	9.258	9.10418	8.99821	9.28811	9.25741	9.19093	9.06041	9.01654	8.88472	9.22837
Mycn	6.65998	6.70778	6.66976	6.68031	6.6637	6.78405	6.6076	6.6972	6.65079	6.65391	6.71454	6.85608	6.63006	6.80226	6.68439	6.79969	6.63494	6.708	6.75188	6.67908	6.7989
Myrfl	6.8291	6.85942	6.84292	6.81238	7.02538	6.84446	6.91706	6.94055	7.20611	6.95926	7.05503	6.97025	6.98842	6.99739	7.11249	7.01087	7.06197	7.18677	7.00973	7.10547	7.11992
Nfe2l3	6.84362	6.84514	6.82844	6.85896	6.95232	6.87363	6.81335	6.82233	6.74942	6.86221	6.86408	6.77254	6.76295	6.75944	6.85887	6.73716	6.71996	6.82157	6.9473	6.90808	6.80239
Npas3	6.67754	6.71622	6.71746	6.71625	6.66425	6.7366	6.64736	6.83182	6.67457	6.65168	6.70222	6.67785	6.84159	6.76547	6.7377	6.76017	6.79045	6.72691	6.71439	6.76644	6.85967
Nr2f2	6.7065	6.73736	6.73055	6.69965	6.75313	6.72668	6.7657	6.73249	6.71477	6.66488	6.75708	6.83241	6.713	6.80465	6.76525	6.76661	6.72685	6.71569	6.66354	6.79213	6.72522
Nr4a2	6.96358	6.97524	6.99796	6.91806	7.38342	7.08802	7.01185	7.64149	7.83308	7.77311	7.30123	7.93359	8.13333	7.30513	8.18364	7.65076	7.9041	7.93515	7.74615	8.26216	8.15459
Nr6a1	9.66062	9.21627	9.13184	9.74252	10.4088	10.4989	10.6167	10.6206	11.1564	11.1473	11.1473	10.8939	11.2458	11.0123	11.2715	10.8692	10.6569	10.9012	11.5849	10.9926	10.763
Nrip1	6.71676	6.75122	6.69155	6.65841	6.55274	6.72177	6.66538	6.6952	6.63587	6.60421	6.76399	6.75309	6.65375	6.6185	6.7437	6.74768	6.73065	6.89473	6.72525	6.85	6.72611
Pak1	7.17893	6.98691	6.9812	7.13581	7.15979	6.96506	7.03924	6.81183	7.14796	7.21451	7.22628	6.82494	6.93129	7.06952	6.58079	7.14219	7.14195	7.20989	7.11233	6.95011	6.78302
Pax1	6.7634	6.81751	6.78268	6.77116	6.76887	6.96002	6.77258	6.7531	6.73199	6.78339	6.74792	6.78731	7.11431	6.89946	6.87708	6.89468	6.74606	6.90322	7.07366	6.84632	6.84456
Pax3	6.74988	6.74226	6.67851	6.71181	6.70493	6.61569	6.63745	6.72254	6.76604	6.66673	6.69252	6.71348	6.94219	6.78059	6.84875	6.74179	6.70692	6.7257	6.67056	6.82512	6.76051
Pou3f3	6.73359	6.73474	6.76023	6.66879	6.67806	6.74845	6.59737	6.60923	6.76541	6.72059	6.70935	6.78777	6.68414	6.68656	6.78926	6.74507	6.81076	6.72788	6.68995	6.83806	6.76344
Pparg	6.70705	6.73957	6.68957	6.70522	6.73868	6.68797	6.69946	6.69363	6.74507	6.74141	6.69258	6.72626	6.74317	6.74685	6.69661	6.71335	6.85351	6.62587	6.75424	6.6728	6.69449
Prickle2	7.07363	7.22764	7.2217	7.07916	7.15591	7.25413	7.31171	7.1451	7.37597	7.31277	7.41225	7.73171	7.71211	7.6265	7.61144	7.63985	7.60639	7.58979	7.43165	7.44972	7.4946
Prrx1	7.26045	7.19363	7.21921	7.24016	6.93604	6.90684	6.86255	6.92212	7.11238	7.00928	6.92074	6.98784	6.94514	6.99867	7.09784	7.46314	7.42842	7.57783	7.68866	7.54613	7.5093
Pxdn	6.8879	6.89967	6.90249	6.89889	7.34739	6.92757	7.05526	7.07027	6.96215	7.0338	6.97153	7.09257	7.08824	7.03404	7.60925	7.02457	7.17257	7.08866	7.08956	7.13966	7.20927
Sall2	7.38812	7.59017	7.50069	7.61961	10.8217	10.4042	10.4343	10.4107	9.99293	10.2022	9.7969	10.5116	10.6515	10.8138	10.4784	10.1667	10.1785	10.3922	9.84284	10.2146	10.3596
Sall3	7.11012	7.84872	7.82586	7.03962	7.72504	7.15684	7.58353	7.67104	9.4524	9.45846	9.88688	10.4078	9.94684	10.3269	10.9895	10.4943	10.109	10.4172	10.1941	10.0967	9.68672
Satb1	8.08038	10.2394	10.1528	8.43648	11.0376	11.1784	11.0049	11.3251	11.4599	11.4249	11.2233	11.6519	11.6222	11.7405	11.5764	12.0943	11.963	12.1065	11.1283	11.757	11.8771
Sdpr	8.50011	7.7904	7.85289	8.43865	6.80801	6.89703	6.68074	6.69848	6.64907	6.75516	6.75243	6.81499	6.97366	6.93893	6.85902	7.10733	6.89399	6.73163	6.94619	6.83454	6.8282
Shroom3	7.27848	7.18955	7.13389	7.33228	8.06085	8.0465	8.19863	7.84083	7.84165	7.86145	7.8956	7.92585	7.97721	8.38226	7.79516	7.59743	7.61852	7.50246	7.85327	7.47783	7.24083
Sla2	6.62917	6.65288	6.64975	6.68041	6.63943	6.78021	6.72246	6.71793	6.73211	6.67343	6.67176	6.61556	6.65138	6.7474	6.7379	6.73897	6.7649	6.80901	6.7284	6.65224	6.68931
Sox4	7.47634	7.61059	7.68543	7.59575	8.95719	8.75318	8.67169	8.88289	8.42532	8.75573	8.73432	9.27002	9.14694	9.16863	9.09089	8.20924	8.24184	8.16714	8.05103	8.44397	8.43371
Sox7	7.17368	7.71988	7.66481	7.13284	6.73216	6.746	6.72998	6.71725	6.72048	6.69293	6.73626	6.73088	6.64609	6.6898	6.76532	6.71542	6.73121	6.77509	6.76244	6.69122	6.73336
Sp8	7.04414	7.16851	7.15503	7.01549	7.95041	7.23003	7.40218	7.34707	8.13187	8.09665	7.98476	8.34332	8.27952	8.38556	8.11041	9.21662	8.80238	8.99562	9.11546	9.02432	8.6607
Spry2	6.61198	6.63978	6.64948	6.66597	6.68729	6.61628	6.64171	6.67113	6.65377	6.65297	6.66284	6.71253	6.69456	6.63509	6.65856	6.88065	6.69906	6.6322	6.67925	6.58417	6.73899
Spry4	8.03482	8.45705	8.5001	8.15612	6.89307	7.00759	7.16626	7.27071	6.96161	6.79054	7.03258	6.8343	7.08991	6.91771	7.19645	6.87378	7.00675	7.02062	6.86932	6.99502	6.94254
Stra13	7.32685	7.26961	7.3166	7.22594	7.40006	7.35786	7.07987	6.97251	7.11152	7.25226	7.43619	7.90065	7.71954	7.36498	7.22674	7.24626	7.44698	7.5436	7.33998	7.42604	7.71499
Sub1	9.5101	9.52685	9.45831	9.53878	9.76273	8.77839	9.3729	9.36853	9.11357	9.12618	9.02918	8.62338	8.62591	9.42517	8.15806	9.6872	9.69155	9.59634	9.92235	10.0272	10.0614
Tbx15	6.76624	6.80224	6.76355	6.76532	6.6831	6.72276	6.72551	6.64658	6.62482	6.70706	6.6822	6.71093	6.68649	6.67251	6.74337	6.6965	6.67904	6.73979	6.72549	6.7022	6.65983
Tbx4	6.83822	7.00227	7.00113	6.83221	6.68351	6.78987	6.73918	6.77151	6.77767	6.77197	6.75676	6.75565	6.78106	6.95903	6.75685	6.77698	6.80563	6.84321	6.90817	6.81687	6.93018
Tdrd5	7.4089	6.81173	6.77581	7.48935	6.75581	6.74139	6.86072	6.75099	6.74301	6.82663	6.72604	6.74875	7.03543	6.87061	6.80719	6.99733	6.76054	6.72729	6.78035	6.7602	6.80185
Tfap2a	6.82972	6.95452	6.91455	6.83592	6.81509	6.86904	6.76839	6.85453	7.50958	7.10264	6.88517	7.05404	7.05571	7.16959	7.18573	7.84034	7.62962	7.95663	7.79669	7.98425	8.01442
Tfeb	6.84383	6.83777	6.87077	6.81741	6.7734	6.79367	6.7805	6.84391	6.84564	6.83676	6.80547	6.83523	6.925	6.83208	6.87358	6.79255	6.98845	6.904	6.809	6.87444	6.89644
Tfec	6.74607	6.83933	6.84817	6.76141	6.70896	6.66667	6.83931	6.83983	6.71282	6.68647	6.84465	6.68185	6.6636	6.77731	6.82301	7.03766	6.85316	6.65933	6.73715	6.92818	6.91
Tgfbr2	7.82059	8.53622	8.46937	7.84735	6.78624	6.76285	6.89966	7.00002	6.72229	6.97758	7.12026	6.93371	6.95568	6.9746	6.70466	6.82605	6.91198	6.86613	6.96881	6.7758	6.86773
Tnks	6.91386	6.7843	6.78685	6.84833	7.50498	8.22562	8.11715	8.25549	7.87845	8.02606	7.97667	6.80979	7.34713	6.91114	7.49306	7.84706	7.64979	7.96193	7.77544	7.8748	7.734
Tshz3	7.55918	7.54271	7.42824	7.6357	6.72861	6.85257	6.8659	6.83597	7.12494	6.7835	6.79232	6.80063	6.7035	7.23397	6.733	7.9724	7.85009	7.814	7.1332	7.93251	7.72889
Wwox	6.75122	6.82046	6.8337	6.76346	6.67276	6.78401	6.77776	6.77535	6.80584	6.74471	6.77224	6.80929	6.80004	6.74817	6.73876	6.79473	6.7183	6.72878	6.78406	6.72563	6.7835
Zbtb14	7.32291	7.2988	7.39332	7.29284	7.61151	7.37254	7.26793	7.67591	7.57856	7.48623	7.53934	7.32289	7.41511	7.40724	7.37712	7.8503	7.60288	7.71049	8.01911	8.05885	8.25668
Zeb2	6.86725	6.90805	6.89866	6.79869	6.8101	6.76843	6.84502	6.84738	7.26872	7.41961	7.52482	7.20202	7.41637	7.27546	7.38147	7.78503	7.70016	7.74815	7.83386	7.86685	7.82017
Zfp800	6.85488	7.14796	7.14643	6.87135	6.71209	6.60019	6.64593	6.66893	6.62908	6.63536	6.60996	6.62705	6.62747	6.60914	6.69112	6.66227	6.65958	6.76792	6.67703	6.72177	6.7006
Zic3	11.0903	11.4041	11.2319	11.0943	11.1994	10.8764	10.4773	11.3191	10.7975	10.8118	11.2967	11.0328	10.8316	11.1429	10.687	12.1574	11.5362	11.9398	12.138	12.2928	12.3647
